# Supplementary material
Source: publisher figshare collection journal article supplement (https://frontiersin.figshare.com/ndownloader/files/14992835)
Supplement: Supplementary file 1 [file 14992835]

**Supplementary Table**

**Table S1.** Review of glaciological studies on the Milam glacier

| Reference Period | Years | Total retreat (m) | Retreat rate (m a-1) | Remarks | References |
| --- | --- | --- | --- | --- | --- |
| 1849-1906 | 57 | 731.5 | 12.83 | Based on eye witness | Cotter and Brown (1907) |
| 1906-1938 | 32 | 512 | 16 | Based on field survey in 1938 | Mason (1939) |
| 1938-1957 | 19 | 106.4 | 5.6 | Based on field survey in 1957 | Jangpangi and Vohra (1959) |
| 1906-1957 | 51 | 618 | 12.1 | Based on field survey in 1957 | Jangpangi (1975) |
| 1906-1966 | 60 | 800 | 13.3 | Based on repeat field survey in 1966 |
| 1957-1966 | 9 | 182 | 20.2 |
| 1966-1997 | 31 | 940 | 30.3 | Based on field survey in 1997 | Shukla and Siddiqui (2001) |
| 1954-1976 | 22 | 440 | 20 | Topographic map (1:250,000) and Landsat MSS (57 m) | Raj (2011) |
| 1976-1990 | 14 | 267 | 19.1 | Landsat MSS (57 m) and Landsat TM (30 m) |
| 1990-1999 | 09 | 297 | 33 | Landsat TM (30 m) and Landsat ETM+ (30 m) |
| 1999-2006 | 7 | 294 | 42 | Landsat ETM+ (30 m) and Resourcesat-1 LISS III (23.5 m) and field-based evidence |
| 1955-2009 | 54 | 1587.6 | 29.4 | Topographic map (1:250,000) and ASTER (15 m) and field-based | Mal and Singh (2013) |
| 2004-2011 | 7 | 480 | 68.6 | Resourcesat-1 and 3 (5.8 m) and field-based | Raj et al. (2014) |
